# Supplementary material for: Bio-based poly(hexamethylene 2,5-furandicarboxylate-co-2,6-naphthalate) copolyesters: a study of thermal, mechanical, and gas-barrier properties
Source: Royal Society of Chemistry journal article supplement (doi:10.1039/d2sm00689h), 2022-01-01
Supplement: d2sm00689h1.pdf [file d2sm00689h1.pdf]

## Supplementary Information

### Bio-based poly(hexamethylene 2,5-furandicarboxylate-co-2,6-naphthalate) copolyesters: A thermal, mechanical, and gas barrier properties study

Hsu-I Mao,<sup>+</sup> Zhi-Yu Yang,<sup>+</sup> Chin-Wen Chen,<sup>\*</sup> and Syang-Peng Rwei<sup>\*</sup>

Department of Molecular Science and Engineering, Institute of Organic and Polymeric Materials, Research and Development Center of Smart Textile Technology, National Taipei University of Technology, No. 1, Sec. 3, Chung-Hsiao East Road., Taipei, 10608, Taiwan

<sup>+</sup>These authors contributed equally to this work.

#####

**Table S1** Component ratio, average sequence length, and degree of randomness of PHF, PHN, and PHFN copolyesters

| Sample      | Component ratio (%) |                      |                  | Average sequence length |                 | Degree of randomness |
|-------------|---------------------|----------------------|------------------|-------------------------|-----------------|----------------------|
|             | N <sub>FHF</sub>    | N <sub>FHN+NHF</sub> | N <sub>NHN</sub> | n <sub>FH</sub>         | n <sub>NH</sub> | R                    |
| <b>PHF</b>  | 100                 | -                    | -                | -                       | -               | -                    |
| <b>F9N1</b> | n.a                 | n.a                  | n.a              | n.a                     | n.a             | n.a                  |
| <b>F7N3</b> | 51.1                | 40.5                 | 8.3              | 3.52                    | 1.41            | 0.99                 |

|             |      |      |      |      |      |      |
|-------------|------|------|------|------|------|------|
| <b>F5N5</b> | 26.7 | 50   | 23.3 | 2.07 | 1.93 | 1.00 |
| <b>F3N7</b> | 8.8  | 43.8 | 47.3 | 1.40 | 3.16 | 1.03 |
| <b>F1N9</b> | n.a  | n.a  | n.a  | n.a  | n.a  | n.a  |
| <b>PHN</b>  | -    | -    | 100  | -    | -    | -    |

The FT-IR spectra of copolymers are illustrated in Fig. S1. The characteristic absorption peaks of C–H stretching oscillations on the aromatic ring are located at 3116–3066  $\text{cm}^{-1}$ . The characteristic absorption peaks at 2934–2926  $\text{cm}^{-1}$  are ascribed to the stretching oscillation of C–H. 1720–1708  $\text{cm}^{-1}$  is the signal of C=O of the ester group, and 1602–1576  $\text{cm}^{-1}$  is the characteristic peak of C=C on the aromatic ring. 1270–1258  $\text{cm}^{-1}$  is assigned to the characteristic peak of C–O on the ester functional group. 970  $\text{cm}^{-1}$  and 770  $\text{cm}^{-1}$  are characteristic peaks presented by C–H on the furan structure and aliphatic groups.

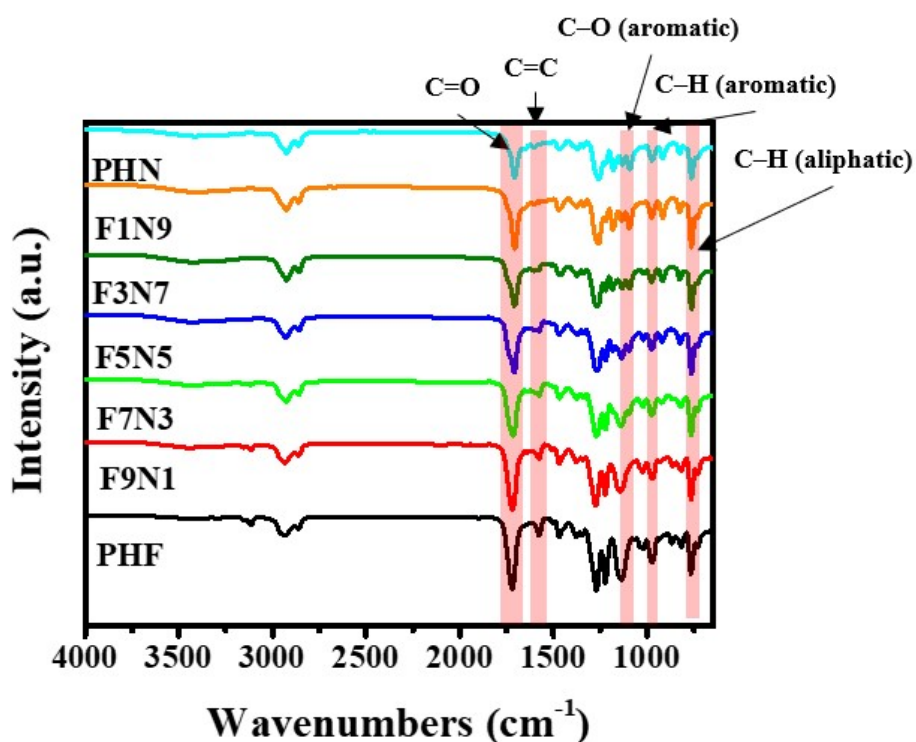

**Fig. S1.** FT-IR spectra of the PHF, PHN, and PHFN copolyesters
